# Supplementary material for: Venetoclax enhances the efficacy of therapeutic antibodies in B-cell malignancies by augmenting tumor cell phagocytosis
Source: PubMed Central journal article supplement — Blood Adv. 2022 Aug 22;6(16):4847–58. doi: 10.1182/bloodadvances.2022007364 (PMC9631674; doi:10.1182/bloodadvances.2022007364), 2022-08-22
Supplement: advancesADV2022007364-suppl1.pdf [file advancesADV2022007364-suppl1.pdf]

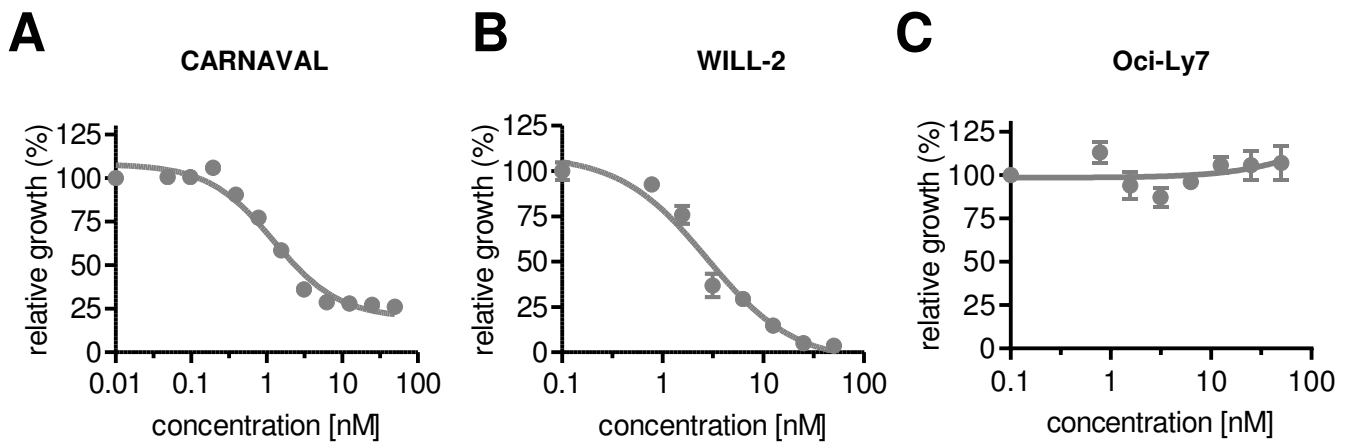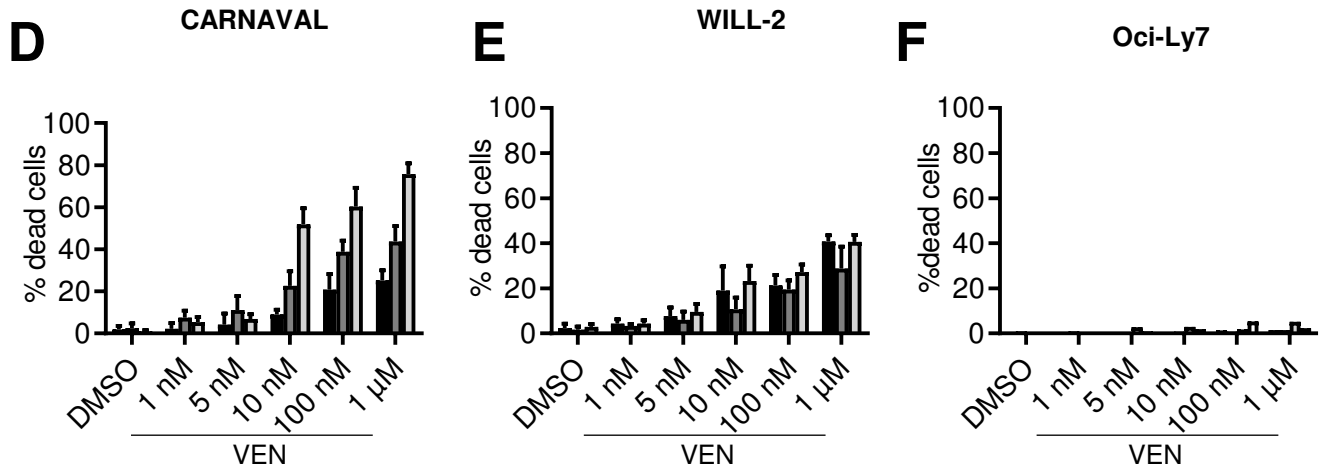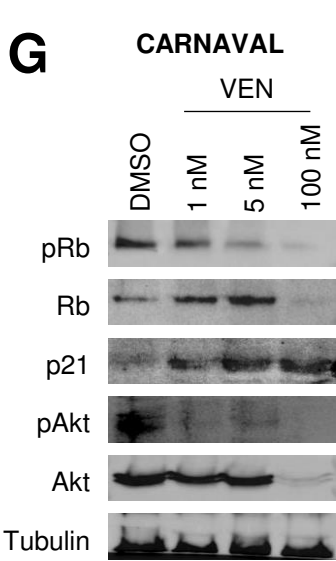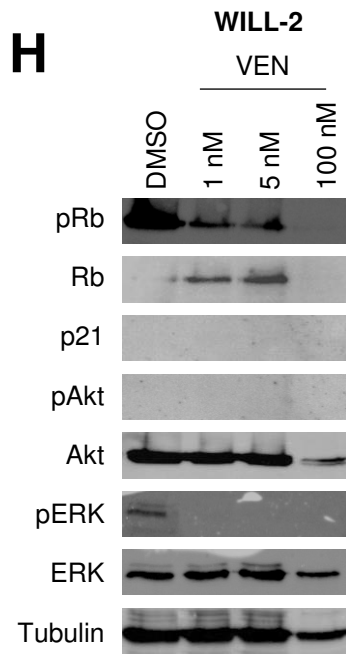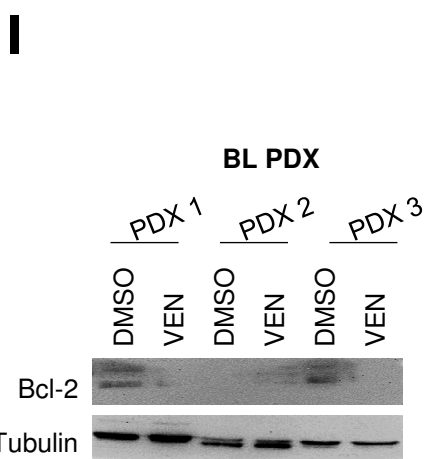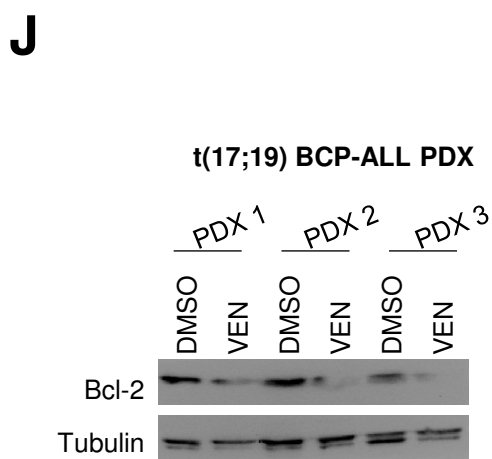

**A**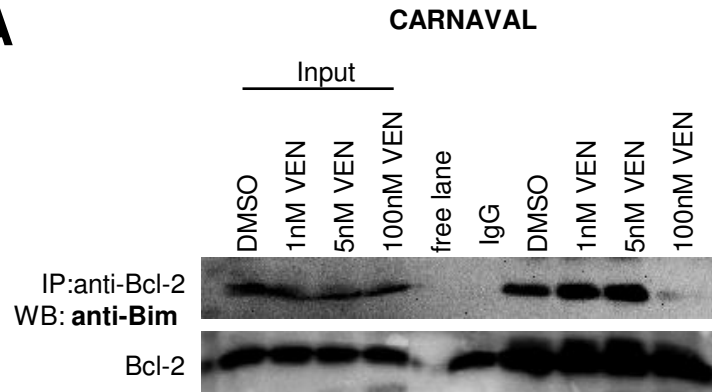**B**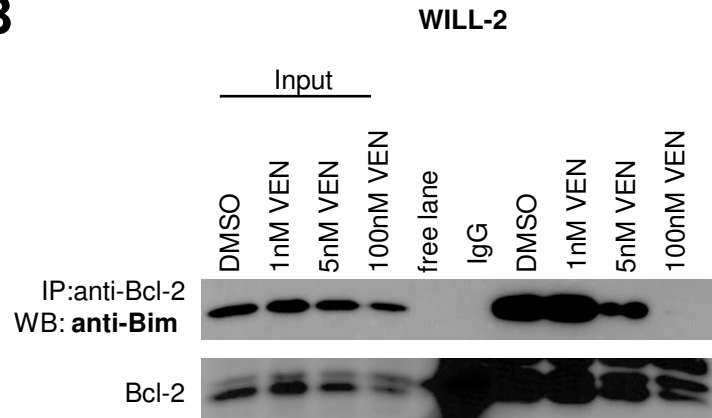

**CARNAVAL**

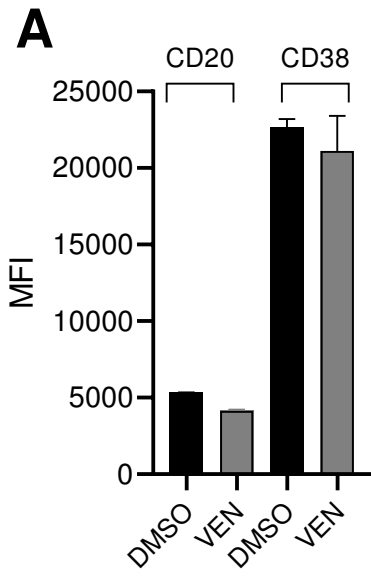

**WILL-2**

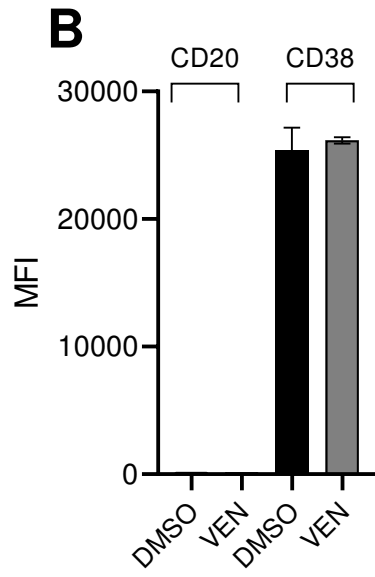

**Oci-Ly7**

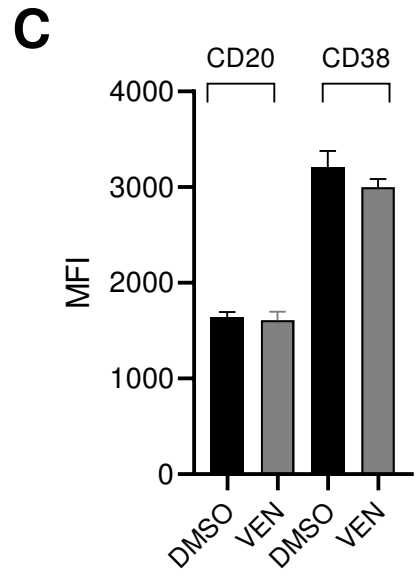

**BL PDX**

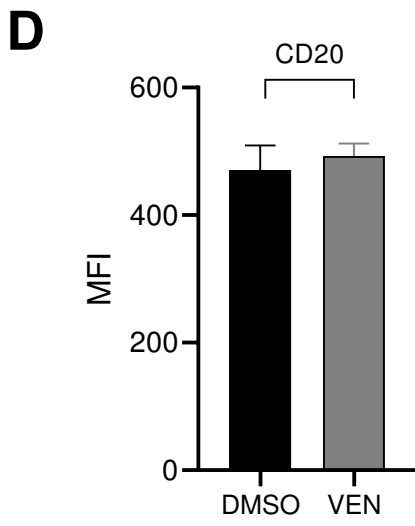

**t(17;19) BCP-ALL PDX**

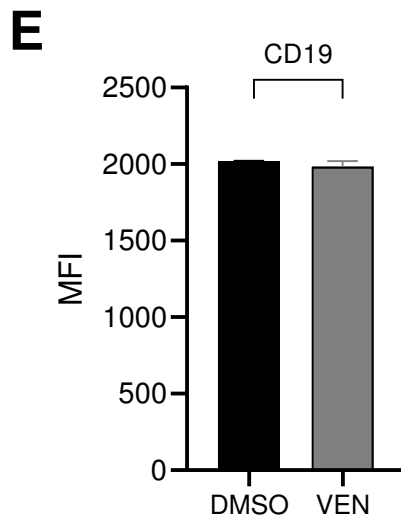

**A**

**CARNAVAL**  
MNC-ADCC

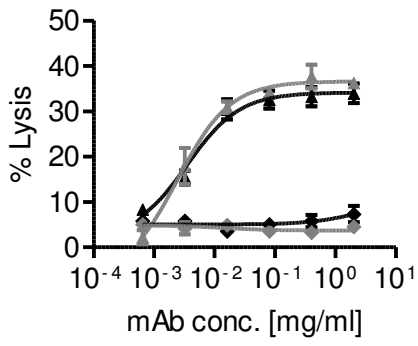

**CARNAVAL**  
CDC

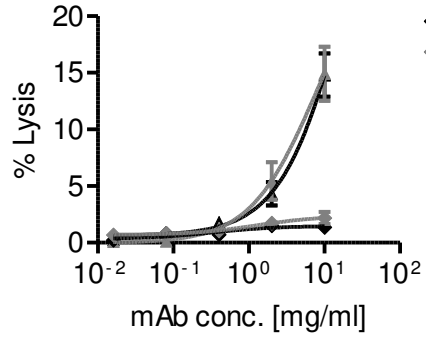

▲ RTX:DMSO  
▲ RTX:VEN  
◆ CTX:DMSO  
◆ CTX:VEN

**B**

**WILL-2**  
MNC-ADCC

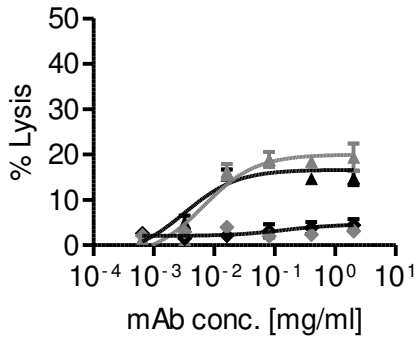

**WILL-2**  
CDC

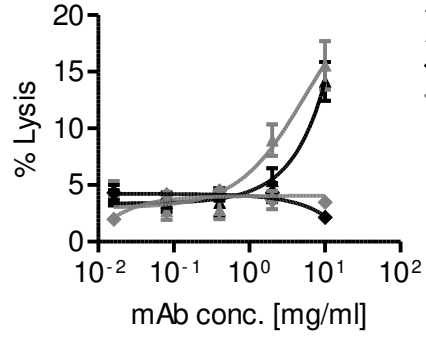

▲ DARA:DMSO  
▲ DARA:VEN  
◆ CTX:DMSO  
◆ CTX:VEN

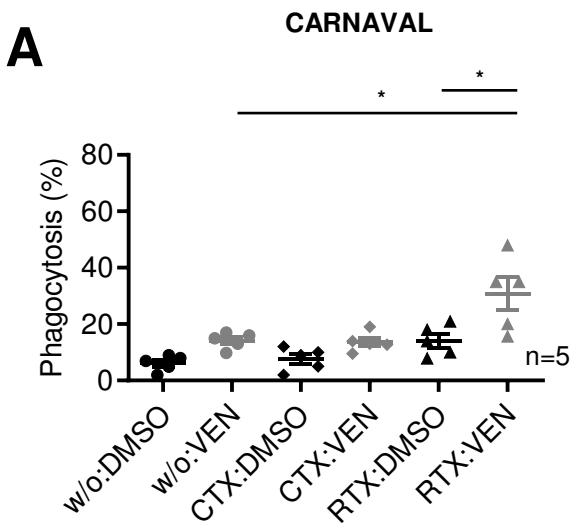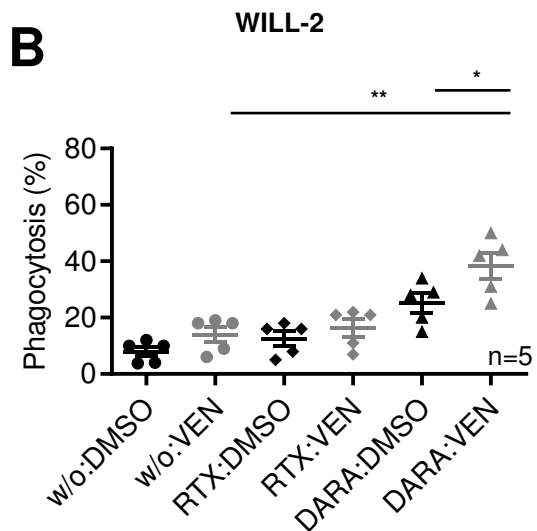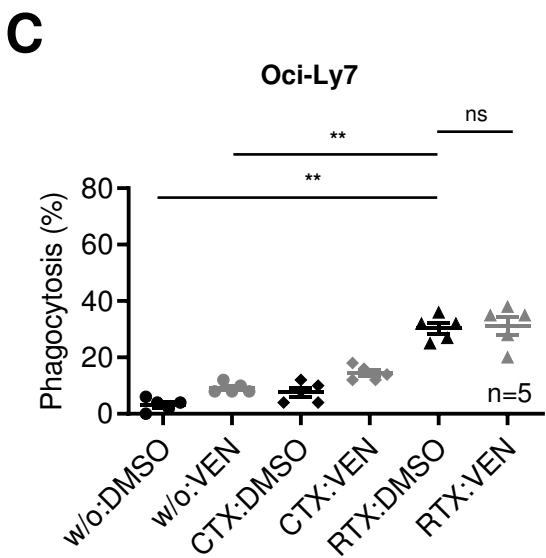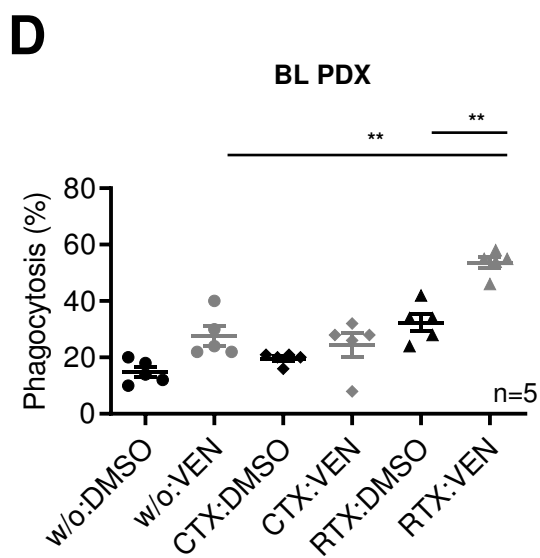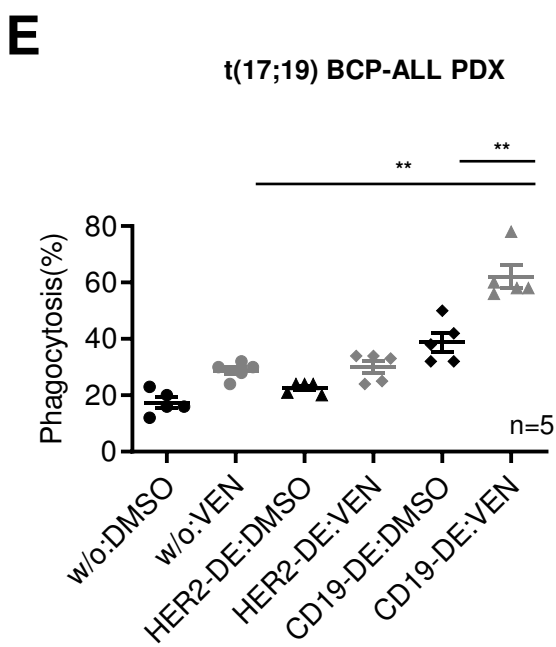

**A**

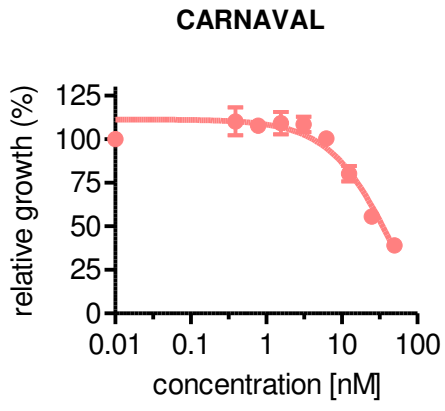

**B**

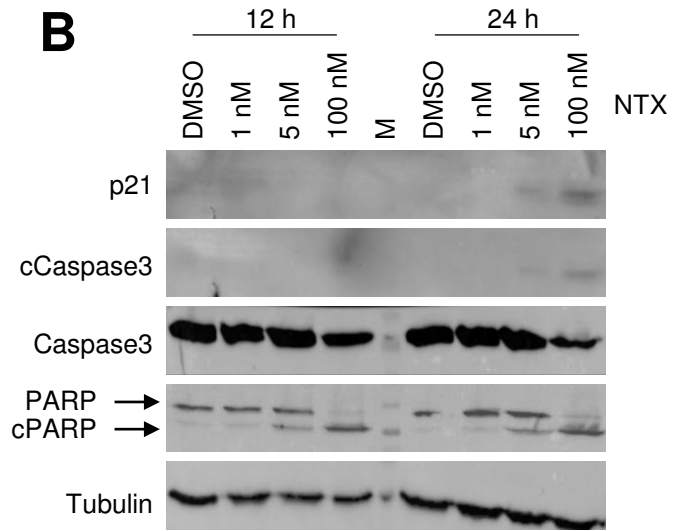

**C**

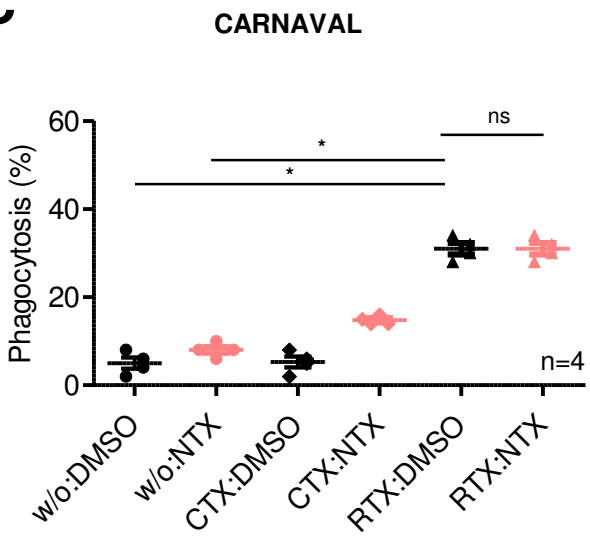

**A**

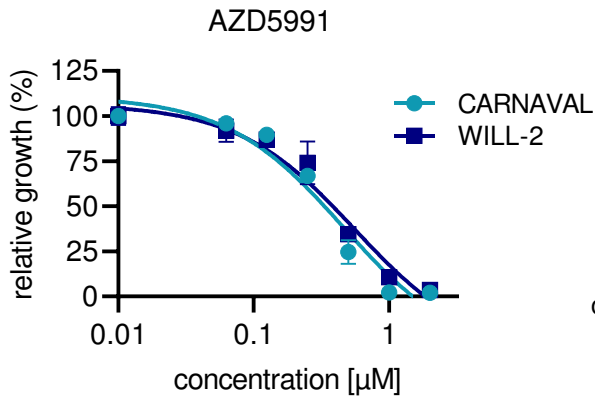

**B**

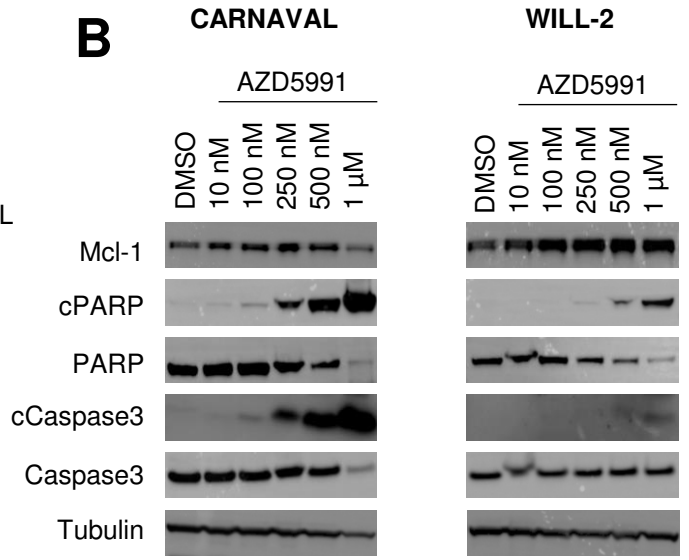

**C**

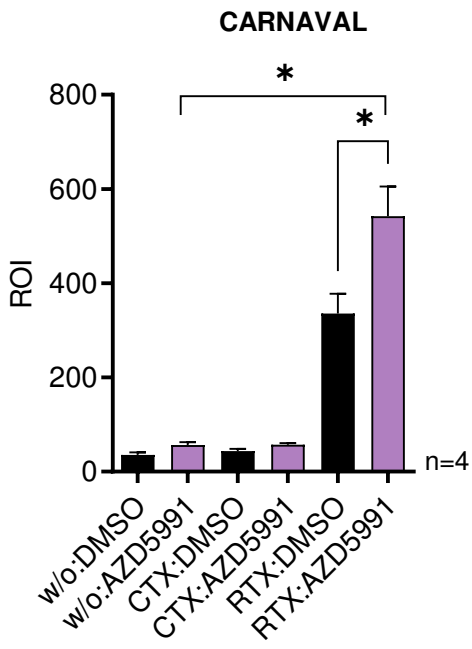

**D**

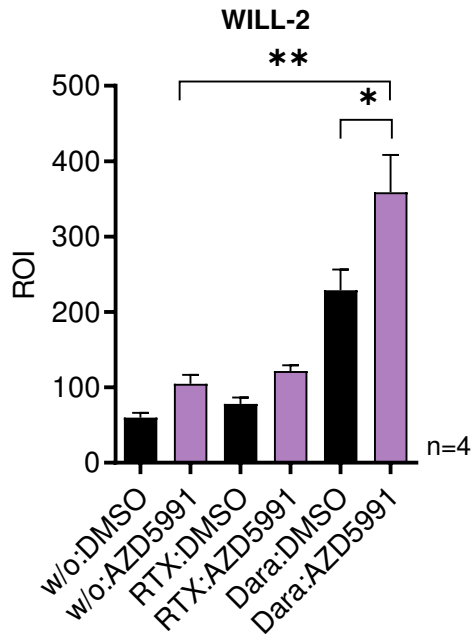

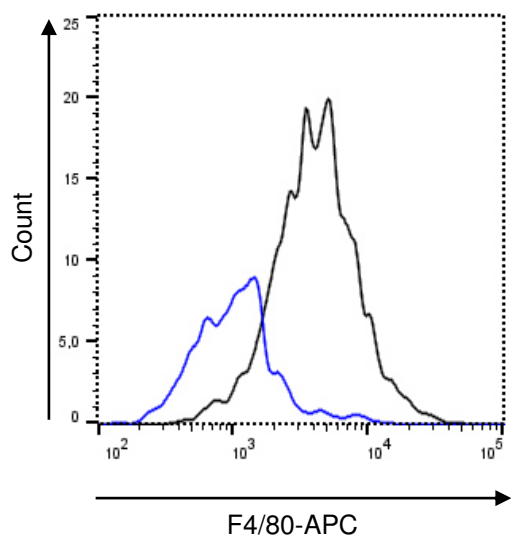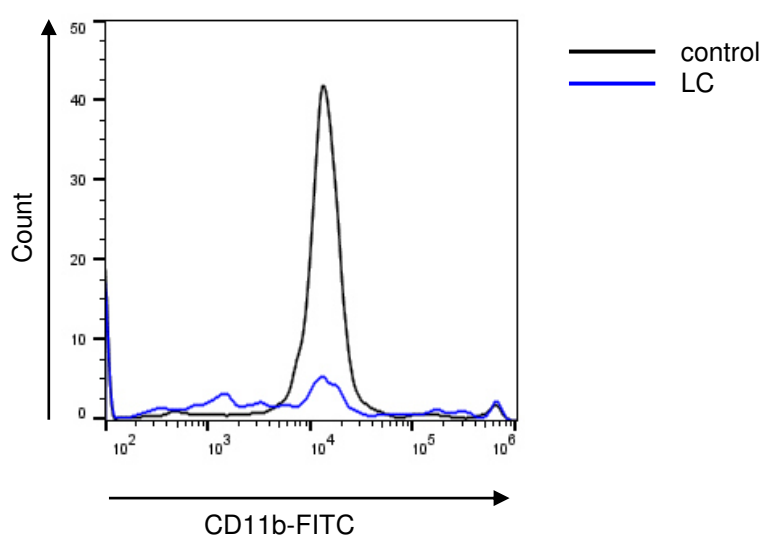



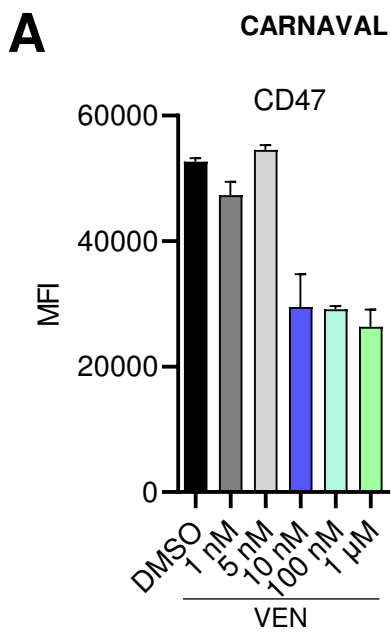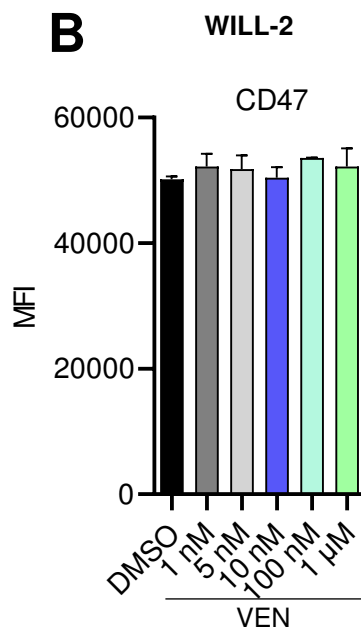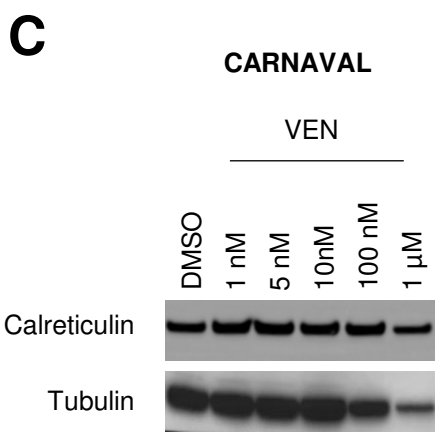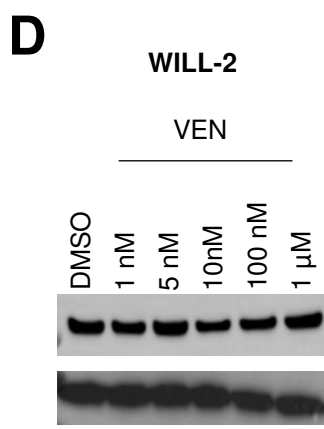

**A**

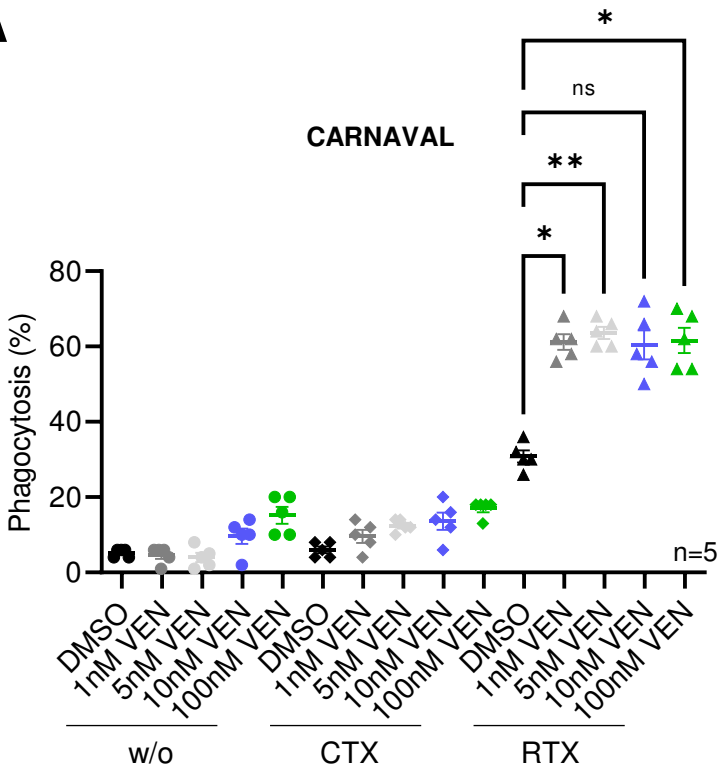

**B**

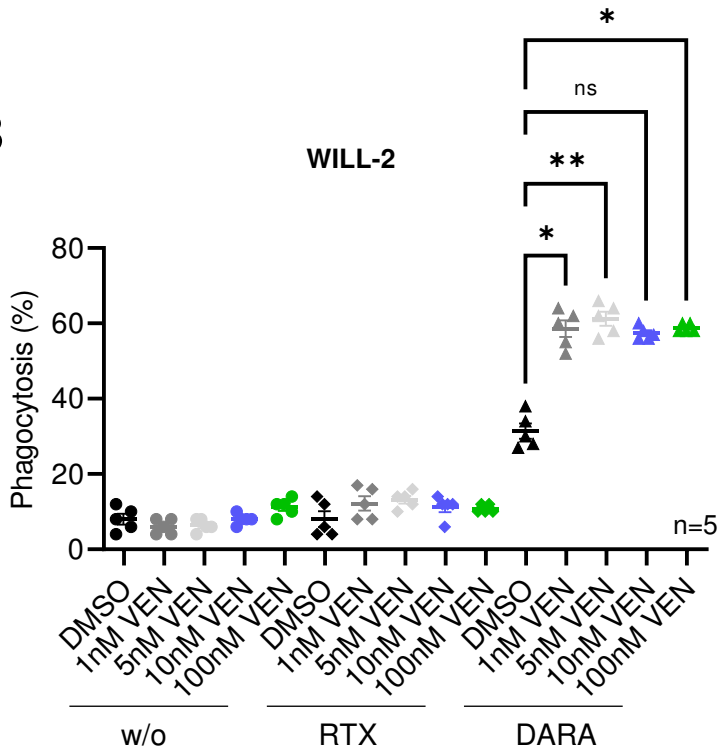

**A**

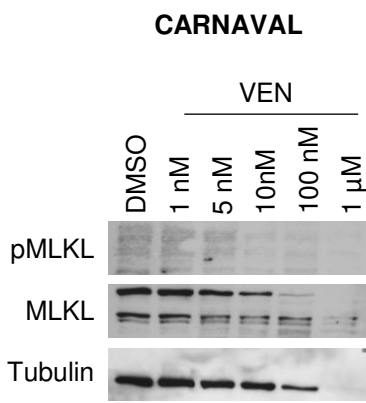

**B**

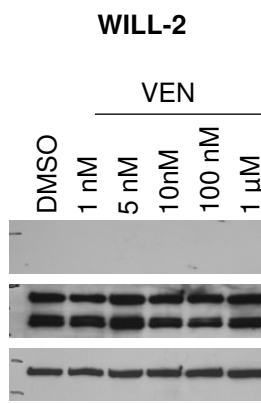

**C**

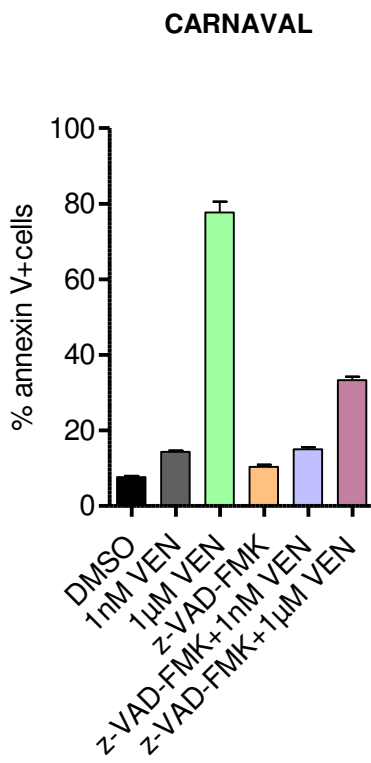

**D**

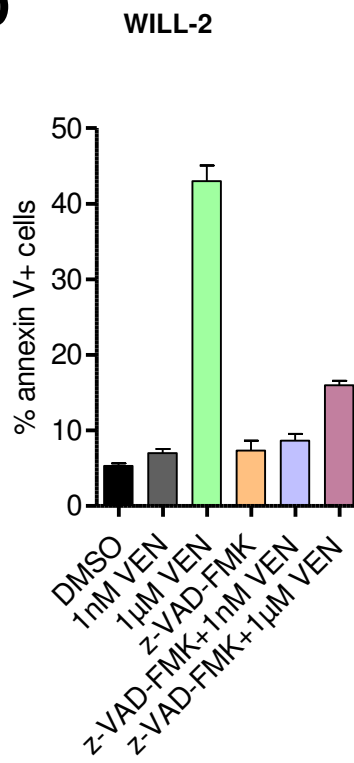

1 **Supplementary Figure Legends**

2

3 **Supplementary Figure 1: Regulation of cell cycle upon VEN treatment in DHL cells**

4 A-C, Determination of EC50 in CARNAVAL (A), WILL-2 (B) and Oci-Ly7 (C) cells using  
5 increasing concentrations of venetoclax (VEN). D-F, *Trypan blue* exclusion test of cell viability  
6 in CARNAVAL (D), WILL-2 (E) and Oci-Ly7 (F) cells treated with increasing concentrations of  
7 VEN for up to 48 h. Technical triplicates were counted per experiment. Graphs show results of  
8 three independent experiments (n=3, SD). G-H, Protein expression of pERK (Tyr204/Tyr187),  
9 ERK, pRb, Rb, p21, pAkt (Ser473) and AKT in CARNAVAL (G) and WILL-2 (H) cells after  
10 treatment with 1 nM, 5 nM, 100 nM VEN or DMSO (solvent control). I-J, Bcl-2 protein levels in  
11 3 different Burkitt-Lymphoma (BL) (I) and t(17;19) BCP-ALL PDX (J) samples after treatment  
12 with 1 nM VEN for 12 h or DMSO analyzed by western blot. Tubulin served as a loading control.

13

14 **Supplementary Figure 2: Interaction of Bcl-2/Bim in DHL cells upon VEN treatment**

15 A-B, Interaction of Bcl-2 and Bim in CARNAVAL (A) and WILL-2 (B) cells after treatment with  
16 various concentrations of venetoclax (VEN) or DMSO (solvent control) for 12 h analysed by  
17 co-immunoprecipitation.

18

19 **Supplementary Figure 3: Cell surface expression of CD19, CD20 and CD38 after**  
20 **exposure to VEN**

21 Cell surface expression of CD19, CD20 and CD38 was analysed by flow cytometry after  
22 treatment with 1 nM venetoclax (VEN) for 12 h or DMSO (solvent control). (A) CD20 and CD38  
23 expression in CARNAVAL cells, (B) CD20 and CD38 expression in WILL-2 cells, (C) CD20  
24 and CD38 expression in Oci-Ly7 (D) CD20 expression in Burkitt-Lymphoma (BL) PDX, (E)  
25 CD19 expression in t(17;19) BCP-ALL PDX. Graphs show results of three independent  
26 experiments (n=3, SEM).

27

28

29

30 **Supplementary Figure 4: Mononuclear cell and complement mediated cell killing in DHL**  
31 **cell lines upon VEN treatment**

32 Antibody-dependent cellular cytotoxicity (ADCC) and complement dependent cytotoxicity  
33 (CDC) analysed by <sup>51</sup>Cr release assay in DHL cell lines treated with venetoclax (VEN). (A)  
34 CARNAVAL cells treated with 1 nM VEN or DMSO (solvent control) for 12 h, rituximab (RTX)  
35 or cetuximab (CTX; control antibody). (B) WILL-2 cells treated with 1 nM VEN or DMSO for 12  
36 h, daratumumab (DARA) or rituximab (RTX; control antibody).

37

38 **Supplementary Figure 5: ADCP using murine macrophages upon combination of VEN**  
39 **and therapeutic antibodies in DHL cell lines and PDX samples**

40 ADCP of cells phagocytosed by murine macrophages with venetoclax (VEN)/antibody  
41 combinations as compared to VEN, antibody (rituximab, daratumumab, CD19-DE) alone or  
42 DMSO (solvent control) in independent experiments. (A) CARNAVAL cells were treated with 1  
43 nM VEN for 12 h, rituximab (RTX) and cetuximab (CTX; control antibody). (B) WILL-2 cells  
44 subjected to 1 nM VEN for 12 h, daratumumab (DARA) and rituximab (RTX; control antibody).  
45 (C) Oci-Ly7 cell subjected to 1 nM VEN for 12 h, rituximab (RTX) and cetuximab (CTX; control  
46 antibody). (D) Burkitt-Lymphoma (BL) PDX sample treated with 1 nM VEN for 12 h, rituximab  
47 (RTX) and cetuximab (CTX; control antibody). (E) t(17;19) positive BCP-ALL PDX sample  
48 subjected to ADCP assays with 1 nM VEN for 12 h, CD19-DE and HER2-DE as the control  
49 antibody.

50 w/o: no antibody. Phagocytosis was determined as the percentage of macrophages with  
51 ingested CFSE green-positive cells per 100 macrophages by at least three independent  
52 observers. Each dot represents an independent experiment with different donors. Data are  
53 presented as mean ± SEM. Statistical analysis: ns= not significant; \*p<0.05; \*\*p<0.005; Mann-  
54 Whitney test. All antibodies used *in vitro* were applied to a final concentration of 10 µg/ml  
55 unless otherwise stated.

56

57

58 **Supplementary Figure 6: ADCP in CARNAVAL cells upon NTX and RTX treatment**

59 (A) Determination of EC50 in CARNAVAL using increasing concentrations of navitoclax (NTX).

60 (B) Protein levels of p21, cCaspase3, Caspase3, cPARP and PARP in CARNAVAL after

61 treatment with various concentrations of NTX for 12 or 24 h or DMSO (solvent control). Tubulin

62 served as a loading control. (C) *In vitro* phagocytosis assay with human macrophages in

63 CARNAVAL cells treated with 50 nM NTX for 12 h or DMSO, rituximab (RTX) and cetuximab

64 (CTX; control antibody). Each dot represents an independent experiment with different human

65 donors (n=4, SEM). Phagocytosis was analyzed as described in the legend to Figure 2.

66 Statistical analysis: \*p<0.05; Mann-Whitney test.

67

68 **Supplementary Figure 7: ADCP in CARNAVAL and WILL-2 after co-treatment with**  
69 **AZD5991 and antibodies**

70 (A) Determination of EC50 in CARNAVAL and WILL-2 cells using escalating concentrations of

71 AZD5991. (B) Protein expression of Mcl-1 and pro-apoptotic markers cCaspase3, Caspase3,

72 cPARP and PARP in CARNAVAL and WILL-2 cells with increasing AZD5991 concentrations.

73 (C) ADCP by using the IncuCyte technology in CARNAVAL and WILL-2 pre-treated with 500

74 nM AZD5991 or DMSO as solvent control 24 h prior to rituximab (RTX), cetuximab

75 (CTX) or no antibody (w/o). Experiments were performed four times with different human donor

76 macrophages (n=4, SEM); Statistical analysis: \*p<0.05; \*\*p<0.005; Mann-Whitney test. ROI:

77 red objects count; Tubulin served as a loading control.

78

79 **Supplementary Figure 8: Analysis of murine macrophage markers in LC-treated mice**

80 Murine (m) F4-80 and mCD11b determined by flow analysis in bone marrow isolated from mice

81 sacrificed 5 days after treatment intraperitoneally with 100 µl liposomal clodronate (LC) or left

82 untreated (control).

83

84

85

86 **Supplementary Figure 9: Calreticulin and CD47 expression in CARNAVAL and WILL-2**  
87 **cells with escalating concentrations of VEN**

88 A-B, Surface expression of CD47 analyzed by flow cytometry in CARNAVAL (A) and WILL-2  
89 (B) cells with increasing concentrations of venetoclax (1 nM - 1  $\mu$ M / 12h). C-D, Protein levels  
90 of Calreticulin in CARNAVAL (C) and WILL-2 (D) cells with escalating concentrations of  
91 venetoclax (VEN, 1 nM - 1  $\mu$ M / 12h). MFI: mean fluorescence intensity; Experiments were  
92 performed three times (n=3, SEM). Tubulin served as a loading control.

93

94 **Supplementary Figure 10: ADCP in CARNAVAL and WILL-2 with escalating**  
95 **concentrations of VEN**

96 ADCP of cells phagocytosed by human macrophages with increasing concentrations of  
97 venetoclax (VEN) /antibody combinations as compared to VEN or antibody (rituximab,  
98 daratumumab) alone in independent experiments. CARNAVAL cells after treatment with 1-100  
99 nM VEN for 12 h and DMSO (solvent control), rituximab (RTX) and the control antibody  
100 cetuximab (CTX) (B) WILL-2 cells treated with 1-100 nM VEN for 12 h and DMSO (solvent  
101 control), daratumumab (DARA) and the control antibody rituximab (RTX). Phagocytosis was  
102 analyzed as described in the legend to Figure 2. Experiments were performed five times with  
103 different human donor macrophages (n=5, SEM). Statistical analysis: ns= not significant;  
104 \*p<0.05; \*\*p<0.005; Mann-Whitney test.

105

106 **Supplementary Figure 11: A-B, Protein levels of necroptotic markers pMLKL and MLKL in**  
107 **CARNAVAL (A) and WILL-2 (B) cells with escalating concentrations of venetoclax (VEN, 1 nM-**  
108 **1  $\mu$ M / 12h). C-D, Annexin V staining in CARNAVAL (C) and WILL-2 (D) cells pre-treated with**  
109 **50  $\mu$ M Z-VAD FMK for 1h followed by 12h with 1 nM or 1 $\mu$ M venetoclax (VEN); (n=3, SEM)**
